# Supplementary material for: The chromatin remodeler RSF1 controls centromeric histone modifications to coordinate chromosome segregation
Source: PubMed Central journal article supplement (PMC6155007; doi:10.1038/s41467-018-06377-w), 2018-09-21

Supplementary information

**The chromatin remodeler RSF1 controls  
centromeric histone modifications to coordinate  
chromosome segregation**

Lee et. al

# Supplementary Figure 1

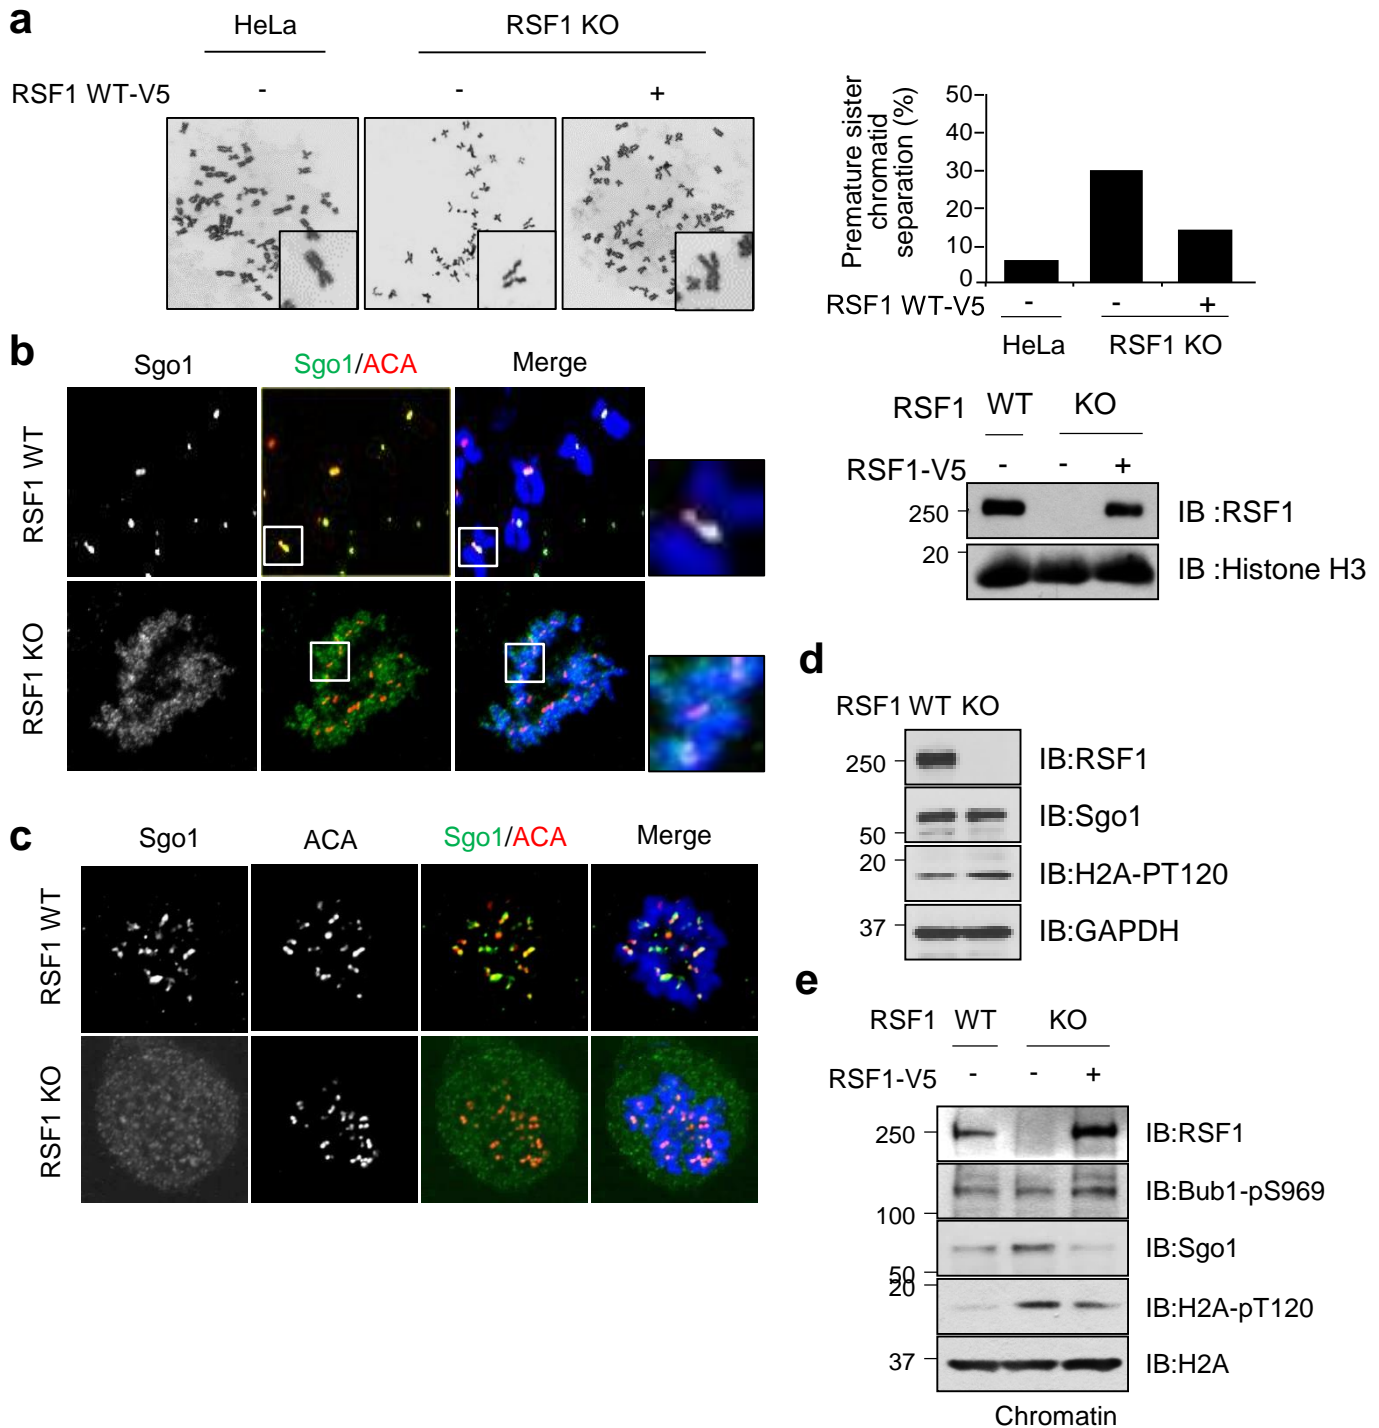

**Supplementary Figure 1. RSF1 depletion hampers Sgo1 recruitment to kinetochores.** (a) RSF1 knockout HeLa cells were transfected with pcDNA or RSF1-V5. Metaphase chromosome spreading was prepared and floating mitotic cells were stained with Giemsa. The Immunoblot at the bottom panel shows efficient reduction of RSF1 and SNF2H protein levels. (b) Immunofluorescence staining with anti-Sgo1 in RSF1 WT or RSF1 knockout HeLa cells. (c) Representative whole-cell images of Sgo1 (green) and ACA (red) staining in WT or RSF1 KO HeLa cells. (d) Western blot confirms the total level of Sgo1 in HeLa cells. (e) RSF1 WT plasmid were transfected into RSF1 KO cells and treated with Paclitaxel for 16h. The chromatin bound fractions were subjected to immunoblot analysis with indicated antibodies.

# Supplementary Figure 2

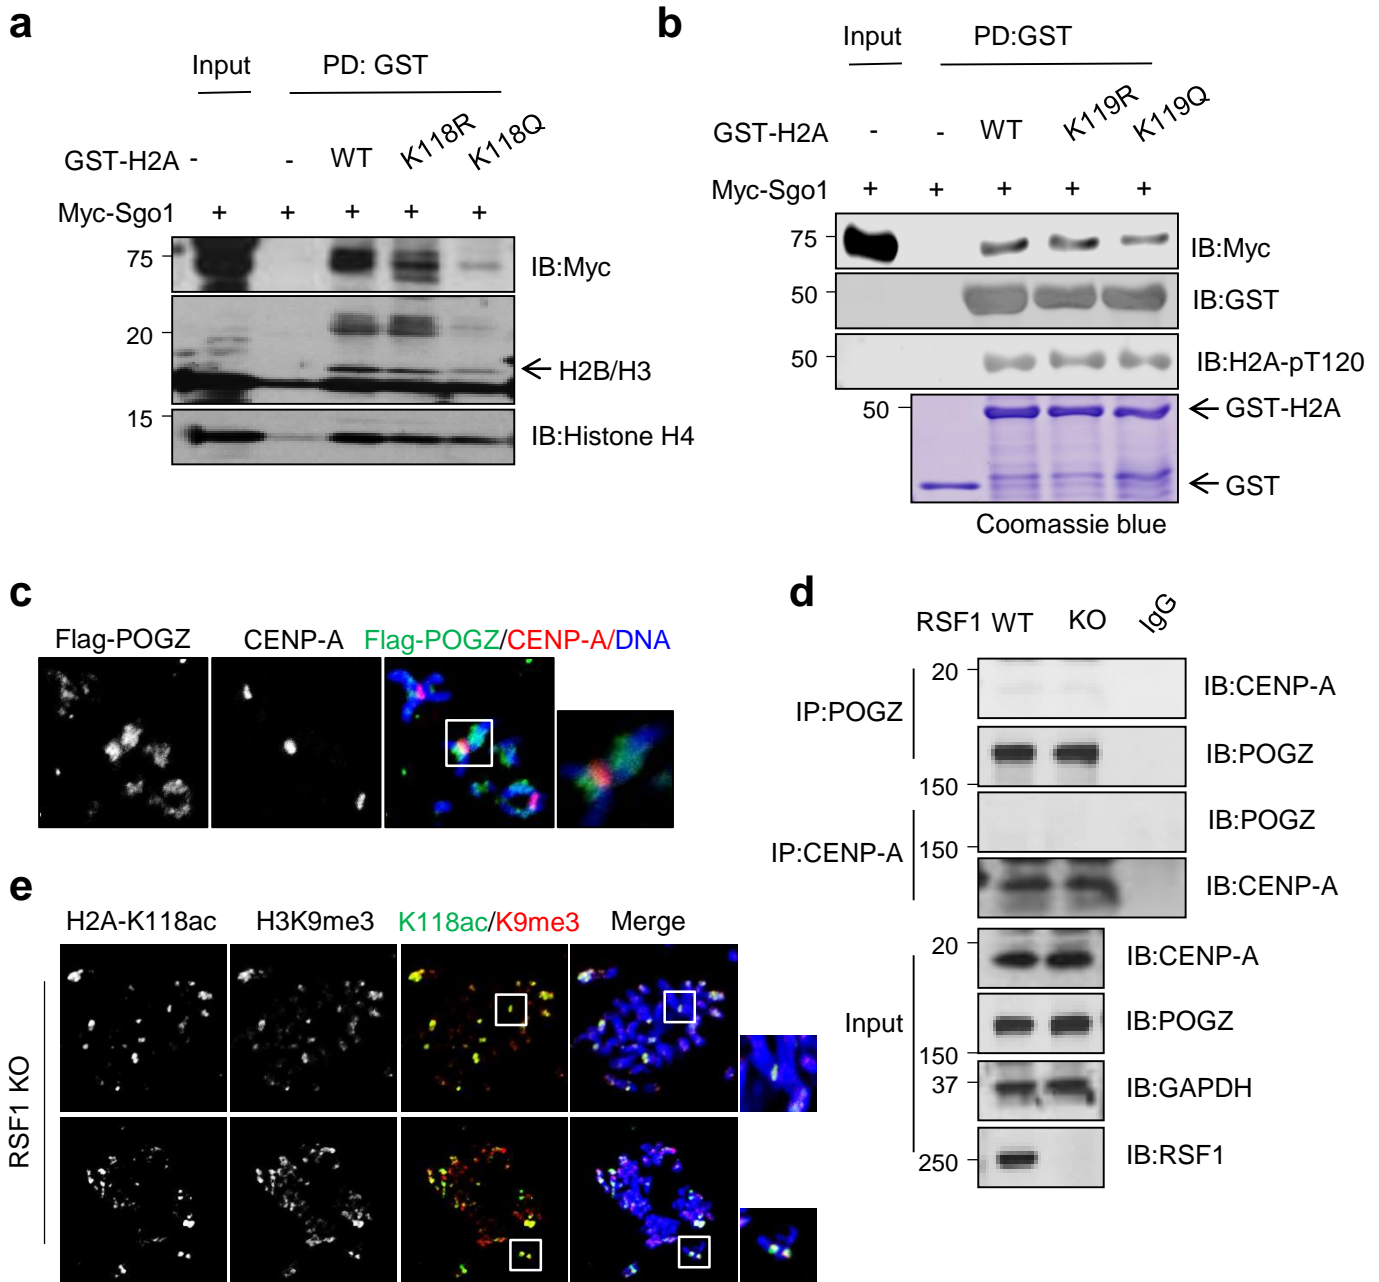

**Supplementary Figure 2. H2A K119 does not affect interaction of between Sgo1 and H2A.** (a) Recombinant GST-H2A WT or K118 mutants were incubated with Myc-tagged Sgo1 expressing mitotic whole cell lysates for 12h at 4 °C and subjected to immunoblot analysis with indicated antibodies. (b) Recombinant GST-H2A WT or K119 mutants were incubated with Myc-tagged Sgo1 expressing mitotic whole cell lysates for 12h at 4 °C and subjected to immunoblot analysis with indicated antibodies. (c) Chromosome spreads were prepared from Flag-POGZ transfected HeLa cells and stained with anti-Flag and anti-CENP-A antibodies. (d) RSF1 WT or knockout HeLa cell lysates were immunoprecipitated using anti-POGZ (chromosome arm protein) or anti-CENP-A (centromere protein) antibodies. Immunoprecipitates were analysed by immunoblot using indicated antibodies. (e) H2A K118 acetylation and Histone H3K9me3 staining in chromosome spreads of mitotic RSF1 WT or KO HeLa cells.

# Supplementary Figure 3

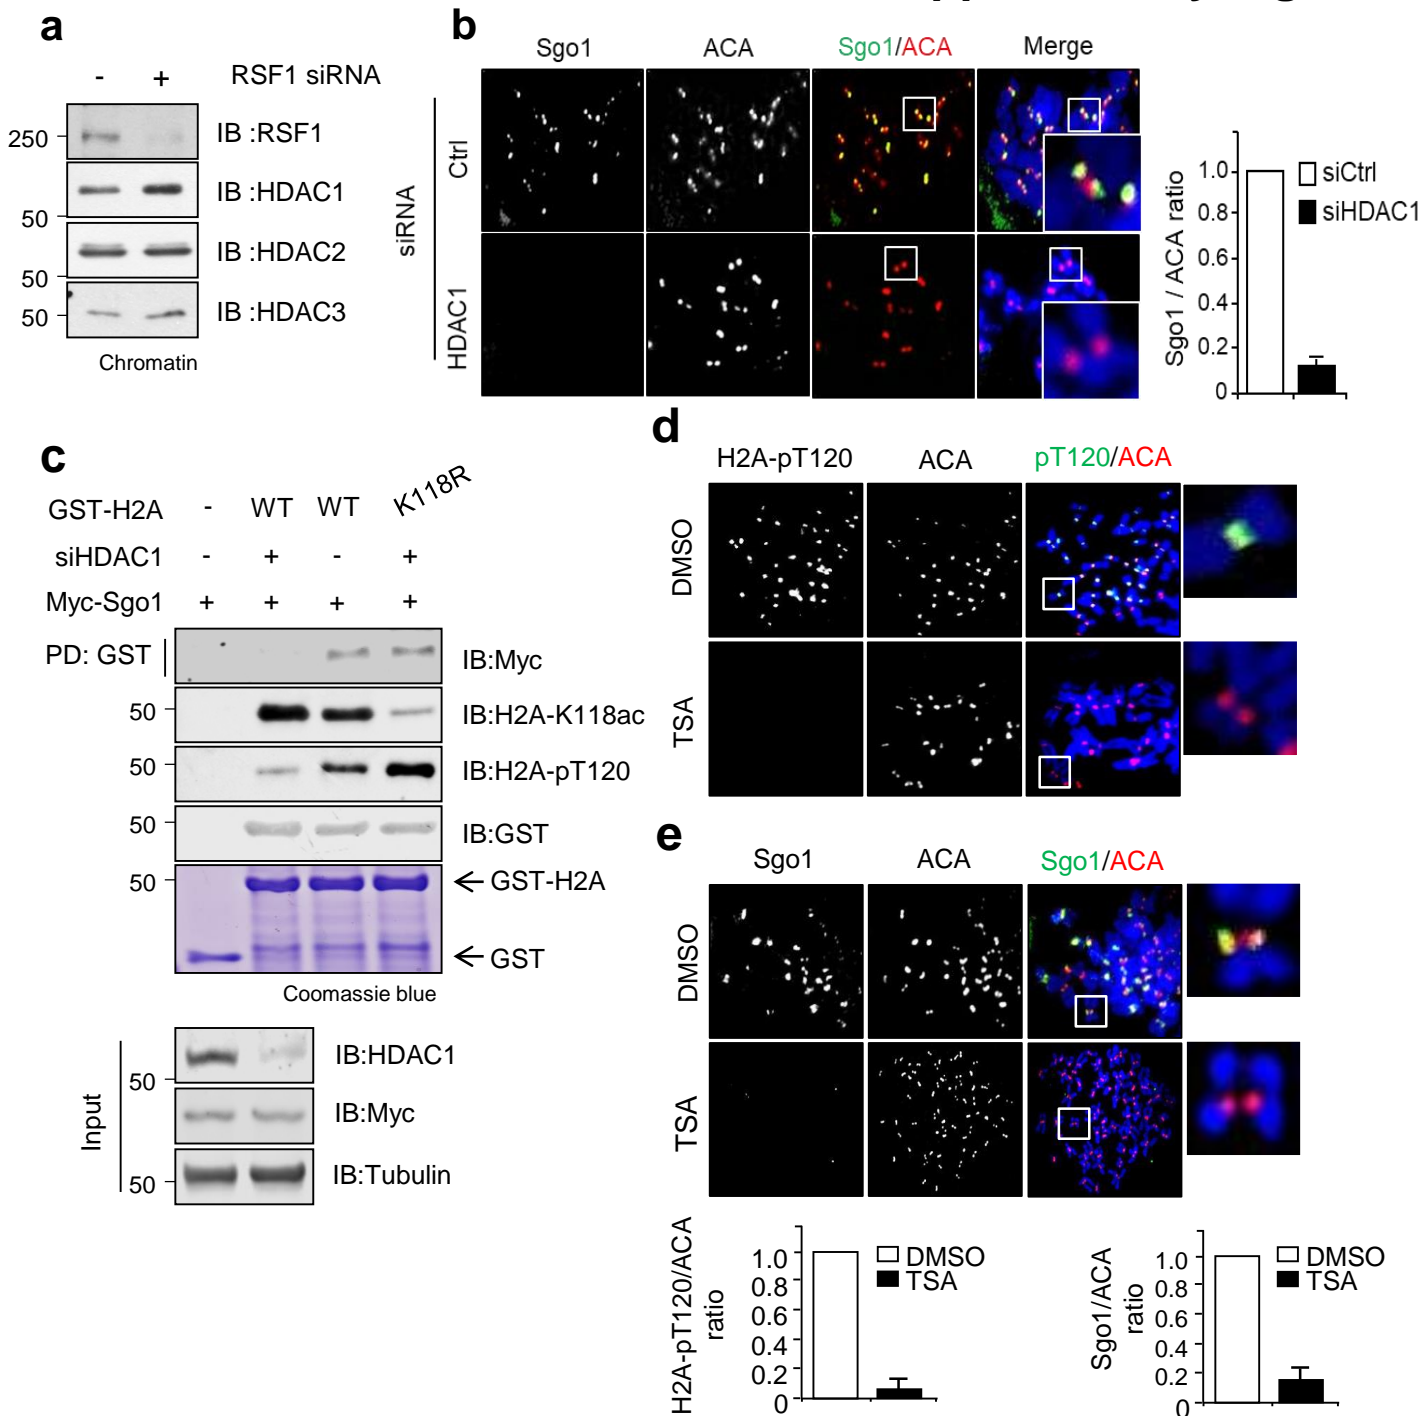

# Supplementary Figure 4

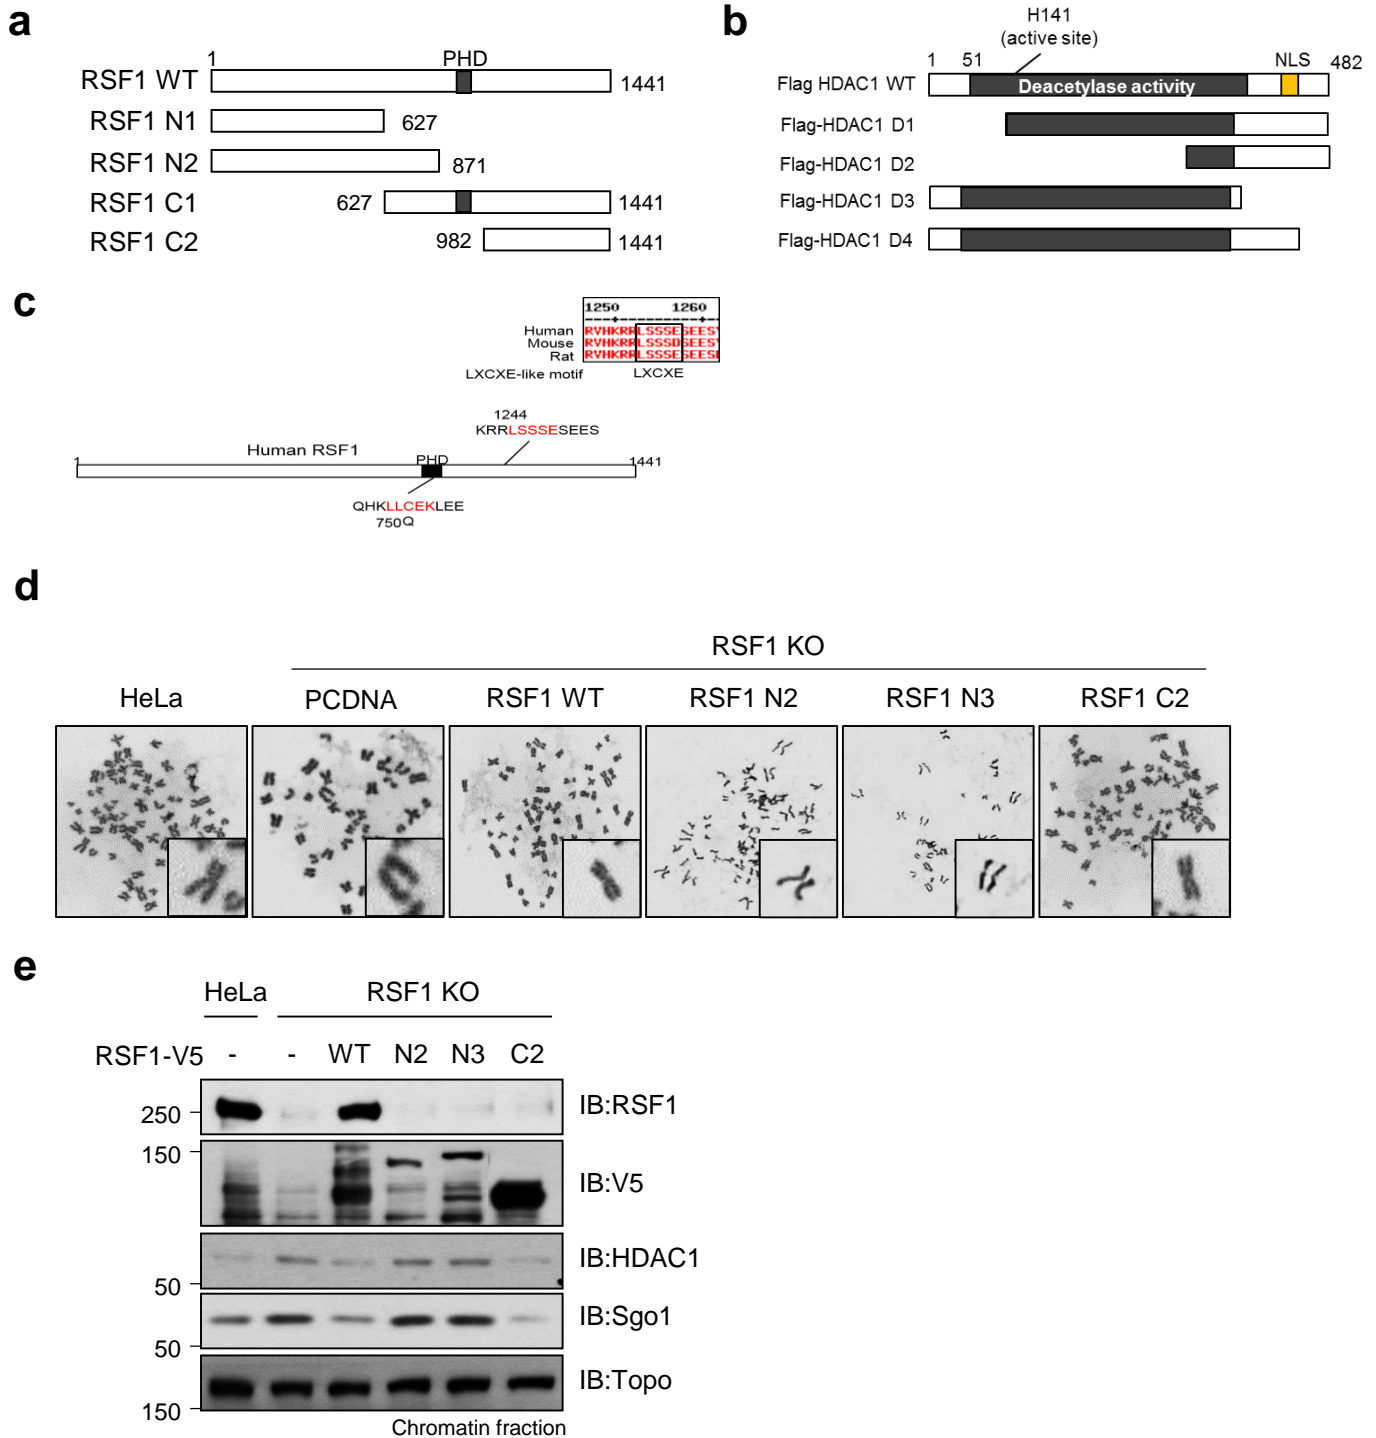

**Supplementary Figure 4. RSF1 associates with HDAC1.** (a) Schematic representation of the deletion mutants of RSF1 organization. (b) Schematic drawings of HDAC1 deletion mutants used in the manuscript. (c) Schematic drawing of domains and motifs of human RSF1, and the sequence alignment of vertebrate RSF1 with the conserved LXCE-like motif. (d) RSF1 knockout cells were cotransfected with indicated RSF1-V5 constructs. Chromosome spreads of nocodazole treated cells stained with giemsa. (e) Chromatin fractions in RSF1 KO cells after reintroduction of indicated RSF1-V5 constructs and cell lysates were subjected to immunoblotting.

# Supplementary Figure 5

**a**

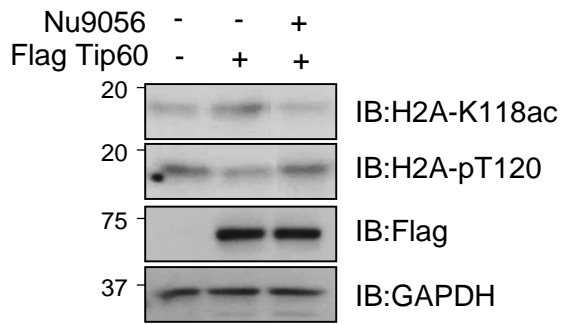

**b**

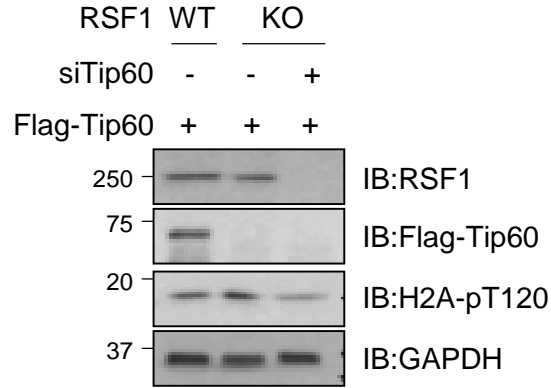

**c**

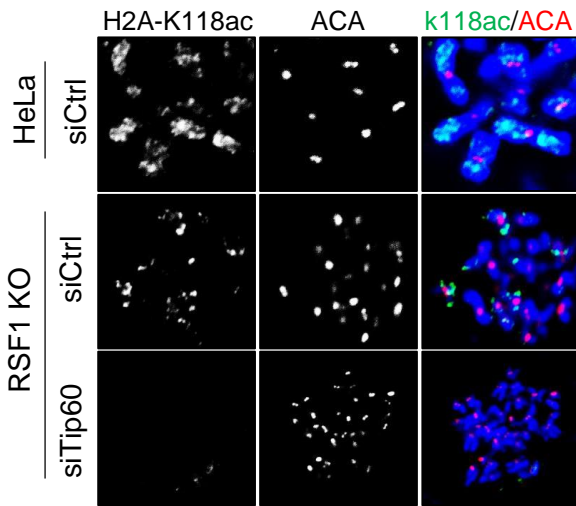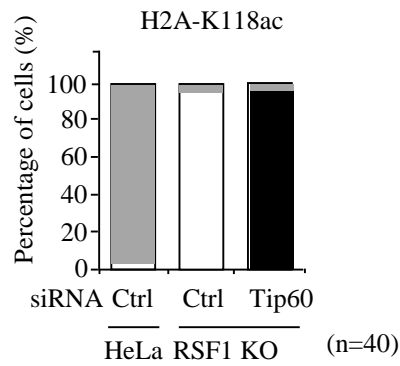

**d**

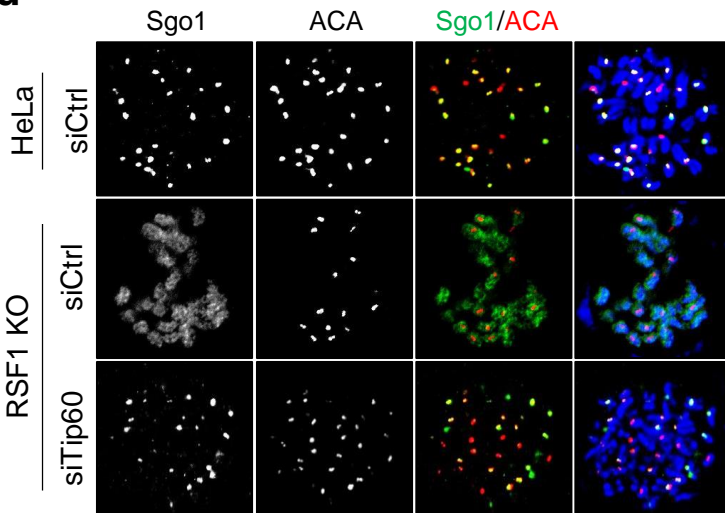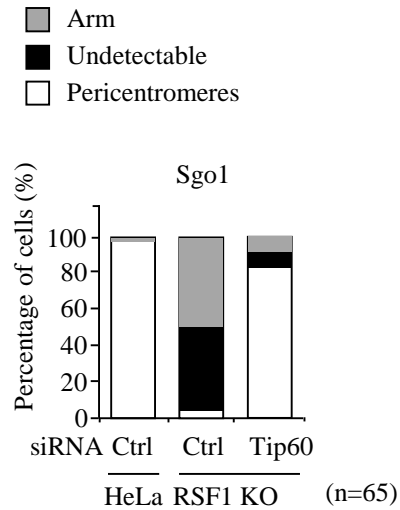

# Supplementary Figure 5

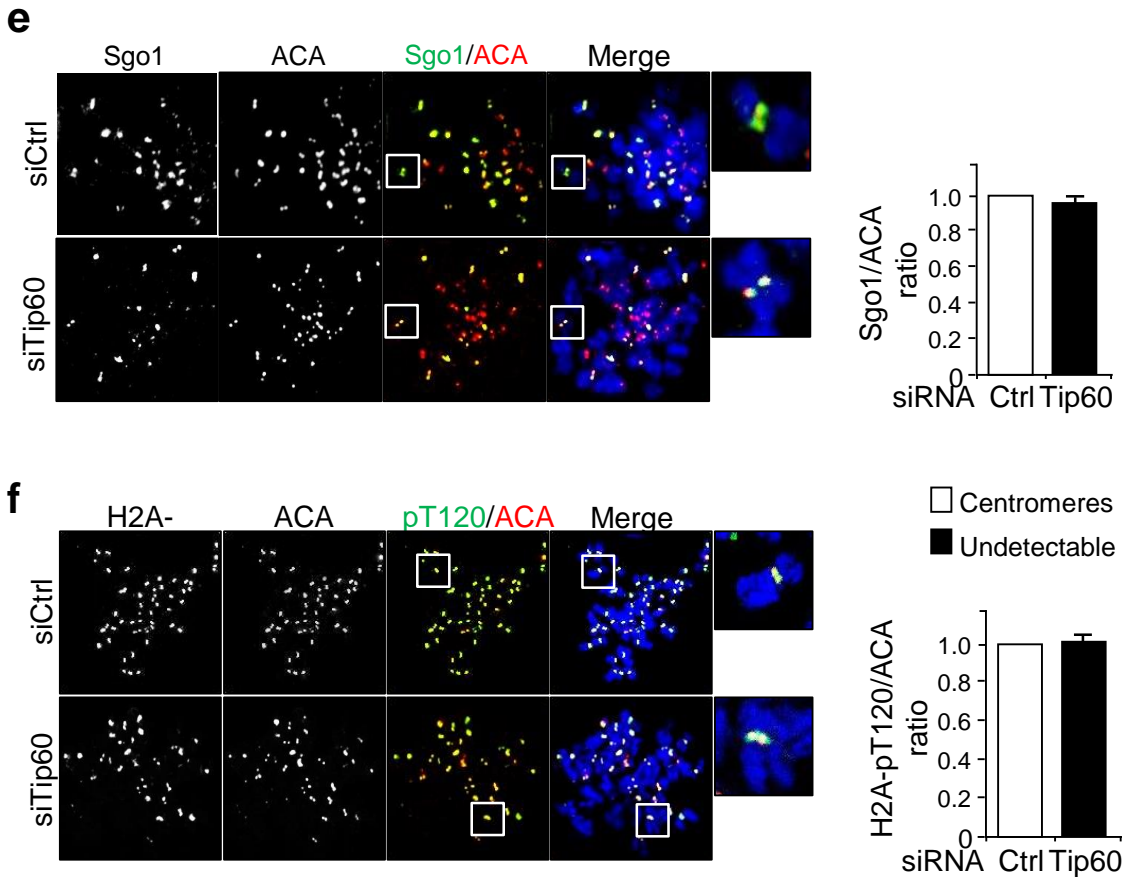

**Supplementary Figure 5. Tip60 acetyltransferase acetylates the H2A-K118.** (a) HeLa cells expressing Flag-Tip60 were synchronized by paclitaxel for 16 h, and the treated with DMSO or NU9056, Tip60 specific inhibitor, for 1 h. Mitotic whole cell lysates were subjected to immunoblotting with indicated antibodies. (b) Immunofluorescence staining of TIP60 (green) and ACA (red) in HeLa cells. Quantification of TIP60 fluorescence intensity (normalized to ACA) at kinetochores in HeLa cells. (c) Immunofluorescence staining of Sgo1 (green) and ACA (red) in Tip60 depleted HeLa cells. (d) HeLa cells transfected with Tip60 siRNA were subjected to chromosome spread and stained with anti-H2A-pT120 and anti-ACA antibodies. (e,f) RSF1 knockout HeLa cells were transfected with control or Tip60 siRNA and stained with anti-ACA (red) and anti-H2A-K118ac (green), anti-Sgo1 (green) antibodies. The percentages of cells exhibiting the arm or centromeric level of H2A-K118ac or Sgo1 are shown.

Figure 1 a

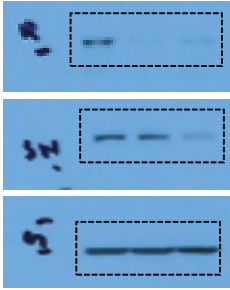

Figure 2 c

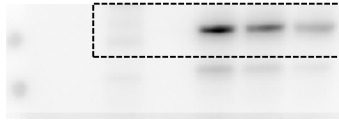

Figure 2 d

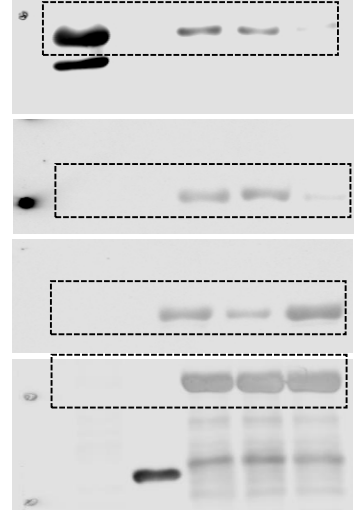

Figure 2 e

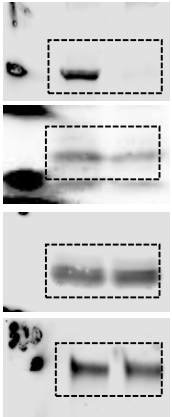

Figure 2 f

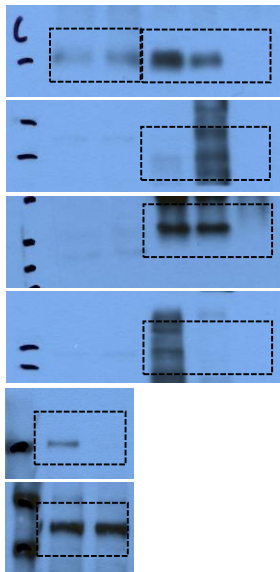

Figure 3 a

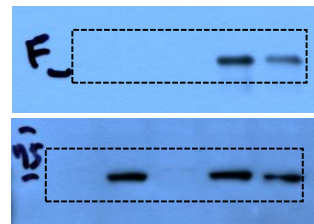

Figure 3 d

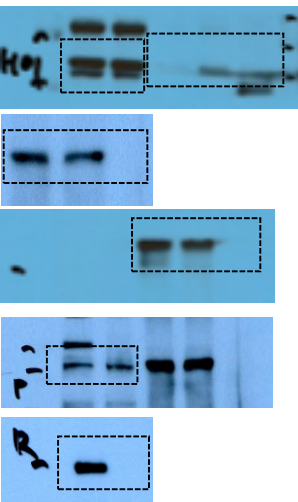

Figure 3 h

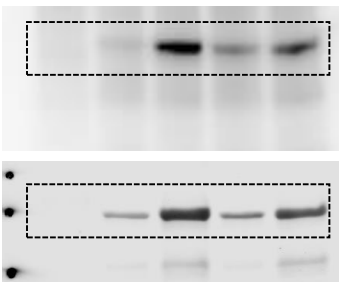

Figure 4 a

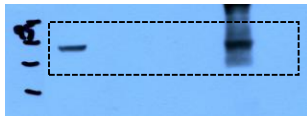

Figure 4 b

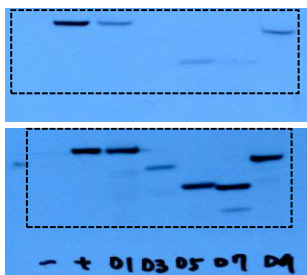



Figure 4 c

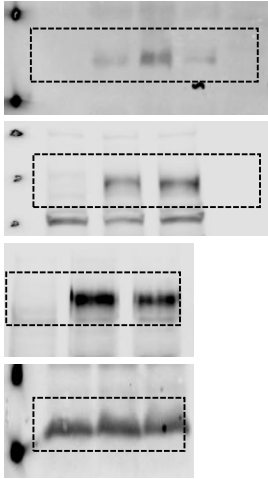

Figure 5 c

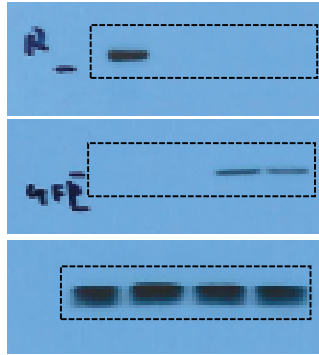

Figure 6 a

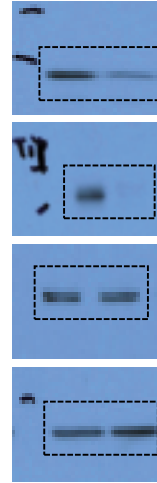

Figure 6 b

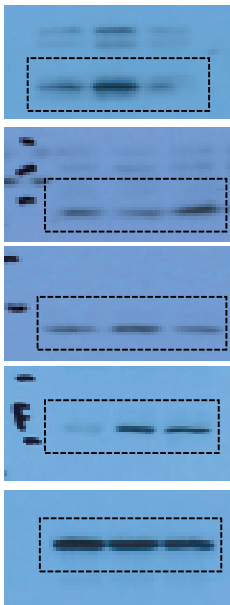

Figure 6 c

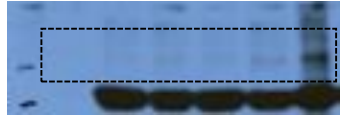

Figure 6d

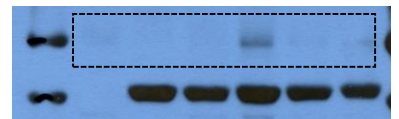

Figure S3 a

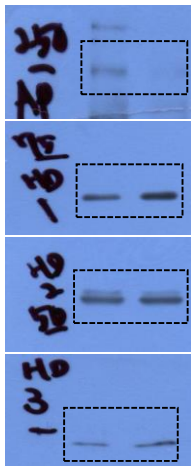

Figure S1 e

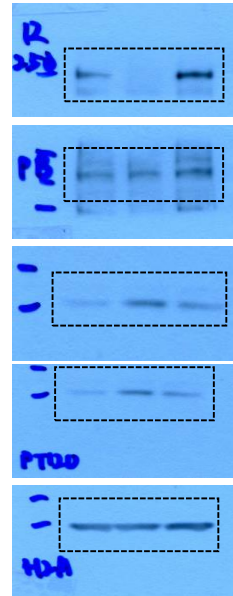

Figure S3 c

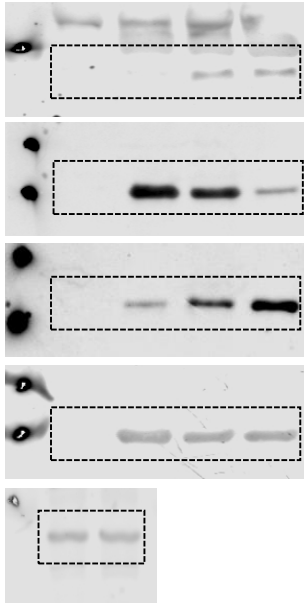

Figure S2 b

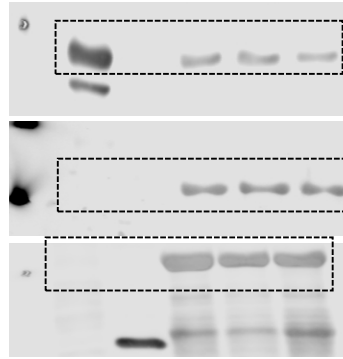

Figure S2 d

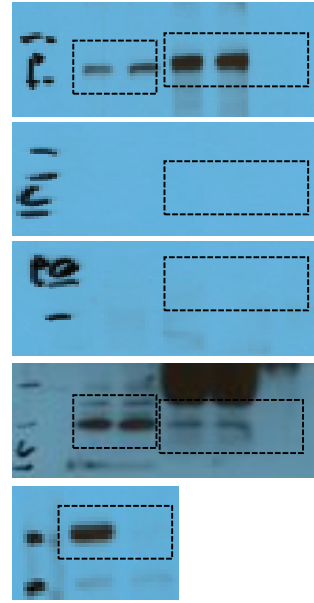

Supplement: 41467_2018_6377_MOESM1_ESM.pdf [file 41467_2018_6377_MOESM1_ESM.pdf]
