# Supplementary material for: The chromatin remodeler RSF1 controls centromeric histone modifications to coordinate chromosome segregation
Source: PubMed Central journal article supplement (PMC6155007; doi:10.1038/s41467-018-06377-w), 2018-09-21
Supplement: 41467_2018_6377_MOESM3_ESM.pdf [file 41467_2018_6377_MOESM3_ESM.pdf]

## **Description of Additional Supplementary Files**

File Name: Supplementary Data 1

Description: The mass spectrometry data of RSF1-interacting proteins.
